# Supplementary material for: Molecular phenotyping of laboratory mouse strains using 500 multiple reaction monitoring mass spectrometry plasma assays
Source: PubMed Central journal article supplement (PMC6123701; doi:10.1038/s42003-018-0087-6), 2018-06-27
Supplement: 42003_2018_87_MOESM1_ESM.pdf [file 42003_2018_87_MOESM1_ESM.pdf]

**Supplementary Figure 1. CPTAC Schematic Representation of the Assay Characterization  
Guidance Document**

(reprinted with permission from

<https://proteomics.cancer.gov/sites/default/files/CPTAC%20Schematic%20Representation%20of%20the%20Assay%20Characterization%20Guidance%20Document.pdf>).

# Assay Development Working Group - Experiments for Assay Characterization

## Experiment 1: *Response Curve*

- Development of multipoint response curve (1 blank and a minimum of 6 concentration points).
- Samples prepared in digested matrix background (i.e. plasma, tissue, cells, etc).
- Used for the determination of LOD, LLOQ and linearity.
- Multiple replicates analyzed.

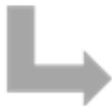

## Experiment 2: *Mini-Validation of Repeatability*

- Examines intra- and inter-assay variability.
- Uses the LLOQ from Experiment 1 from which 3 concentrations (Low, Medium and High) are used to assess repeatability.
- 3 replicates processed and measured on 5 different days.

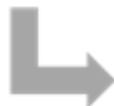

## Experiment 3: *Selectivity*

- Examines the response of a peptide in six different biological replicates of the matrix.
- Replicates analyzed with no spike and 1/2 the Medium and Medium concentrations defined in Experiment 2.

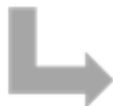

## Experiment 4: *Stability*

- Examines the stability of a peptide spiked into a background matrix
- Stability assessed based on peak area variability following:
  - different storage conditions (4C and -70C) over time.
  - freeze-thaw cycles
- Variability compared to data collected from Experiment 2.

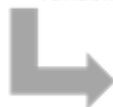

## Experiment 5: *Reproducible Detection of Endogenous Analyte*

- Representative sample containing endogenous analyte is digested 5 times on each of 5 days.
- Examines intra- and inter-assay variability of the entire assay workflow, including digestion.

# Experiment 1: *Response Curve*

## KEY POINTS

- Development of multipoint response curve (1 blank and a minimum of 6 concentration points).
- Samples prepared in digested matrix background (i.e. plasma, tissue, cells, etc).
- Used for the determination of LOD, LLOQ and linearity.
- Multiple replicates analyzed.

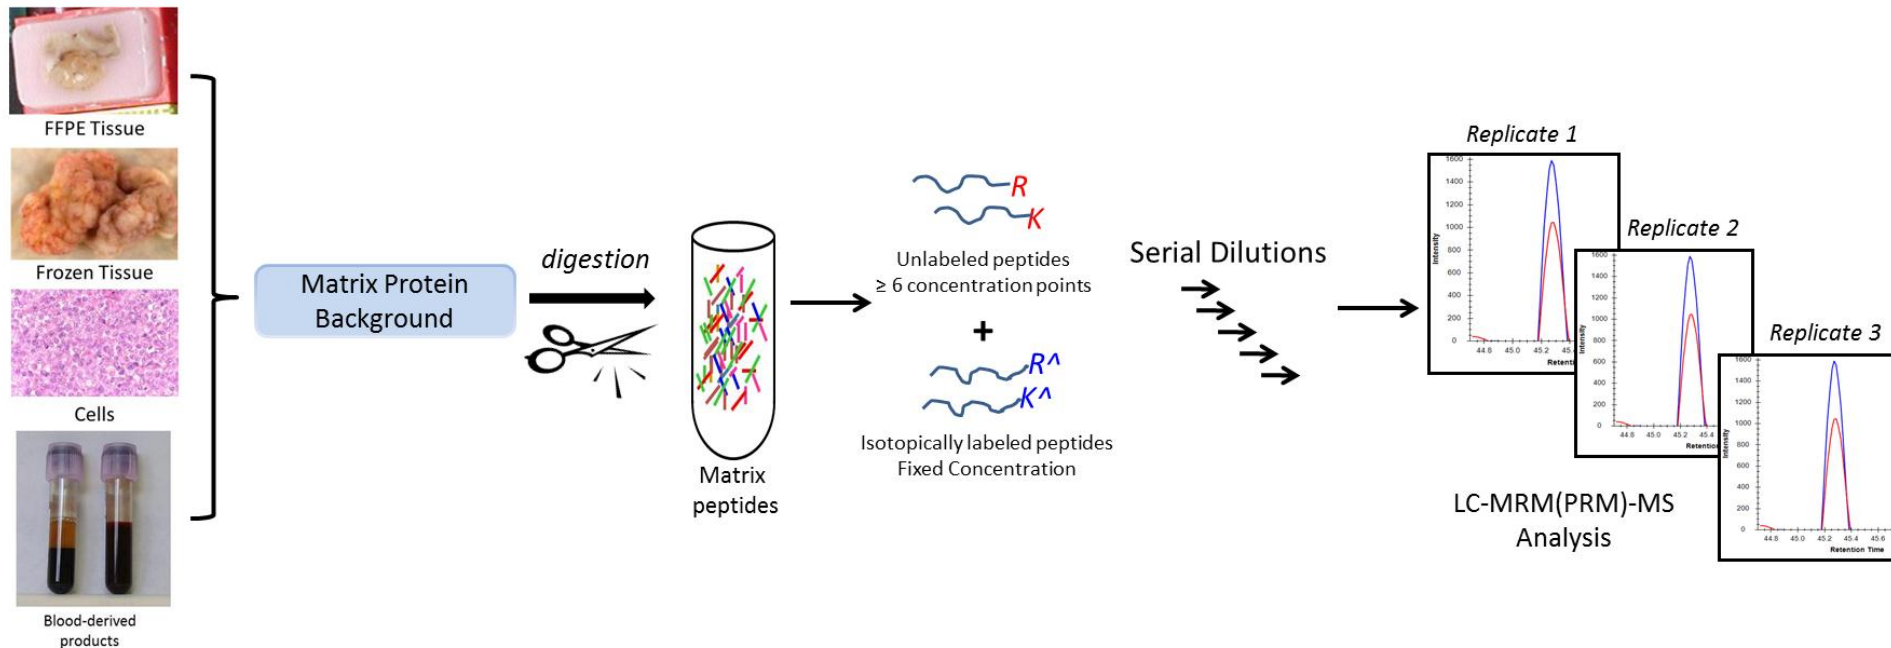



# Experiment 3: *Selectivity*

## KEY POINTS

- Examines the response of a peptide in six different biological replicates of the matrix.
- Replicates analyzed with no spike and ½ the Medium and Medium concentrations defined in Experiment 2.

Six Biological Replicates of Matrix

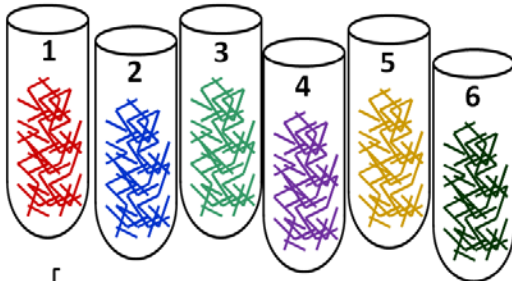

Target Peptides Stock Solutions

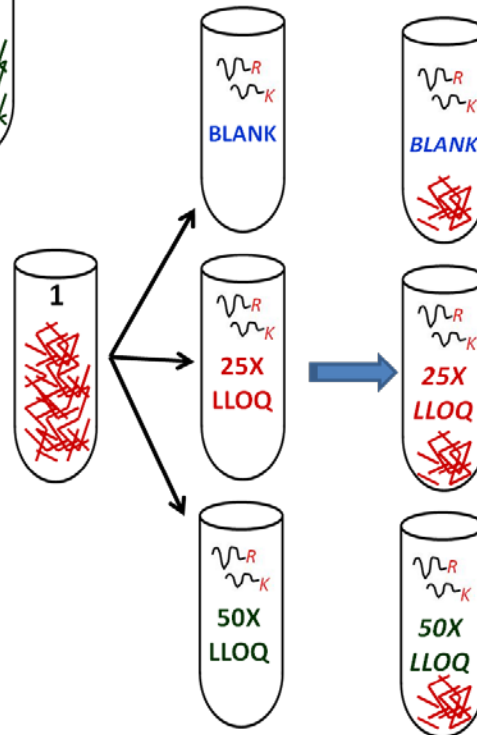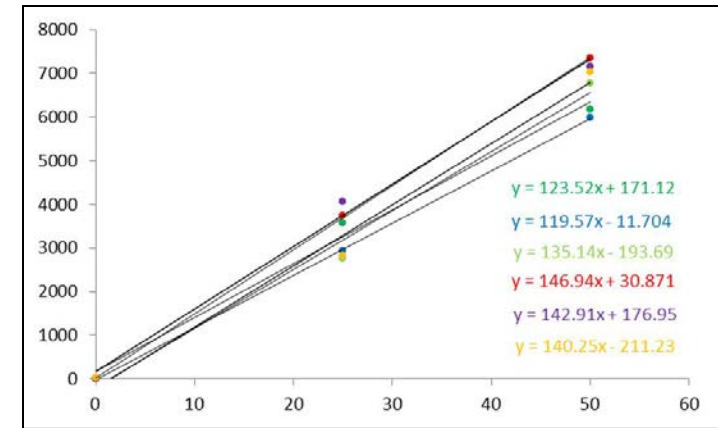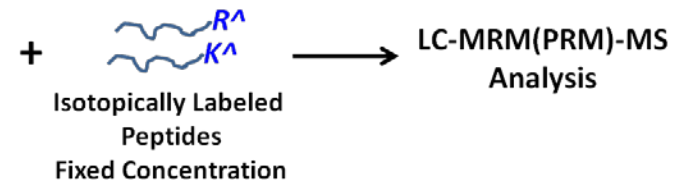

## Experiment 4: *Stability*

### KEY POINTS

- Examines the stability of a peptide spiked into a background matrix
- Stability assessed based on peak area variability following:
  - different storage conditions (4C and -70C) over time.
  - freeze-thaw cycles
- Variability compared to data collected from Experiment 2.

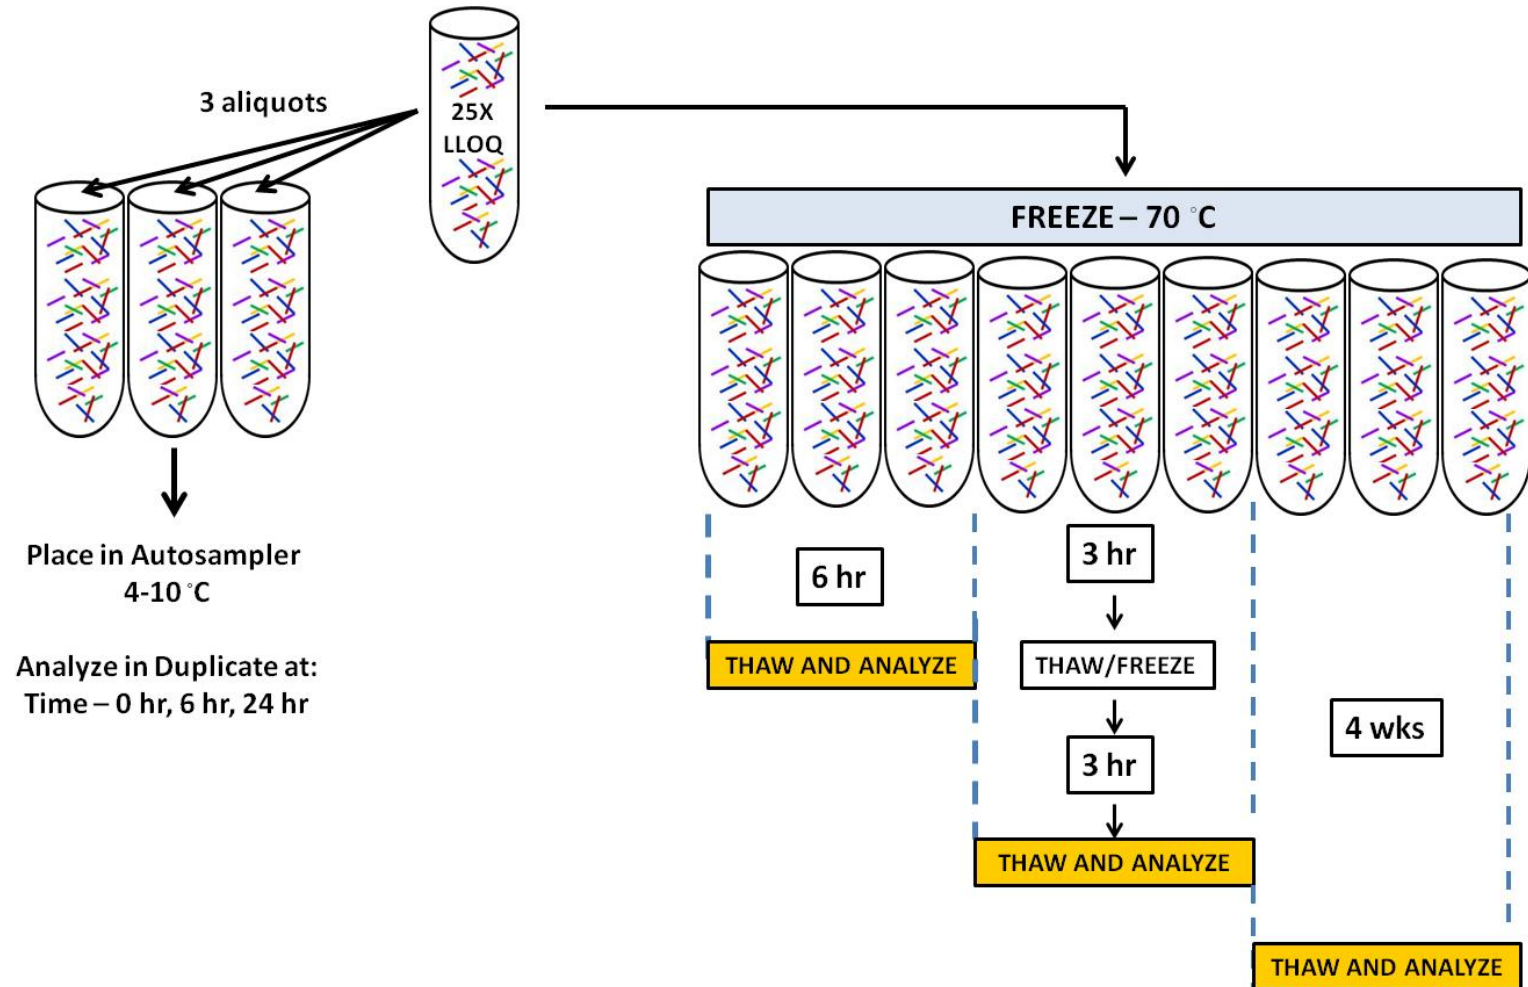

# Experiment 5: *Reproducible Detection of Endogenous Analyte*

## KEY POINTS

- Representative sample containing endogenous analyte is digested 5 times on each of 5 days.
- Examines intra- and inter-assay variability of the entire assay workflow, including digestion.

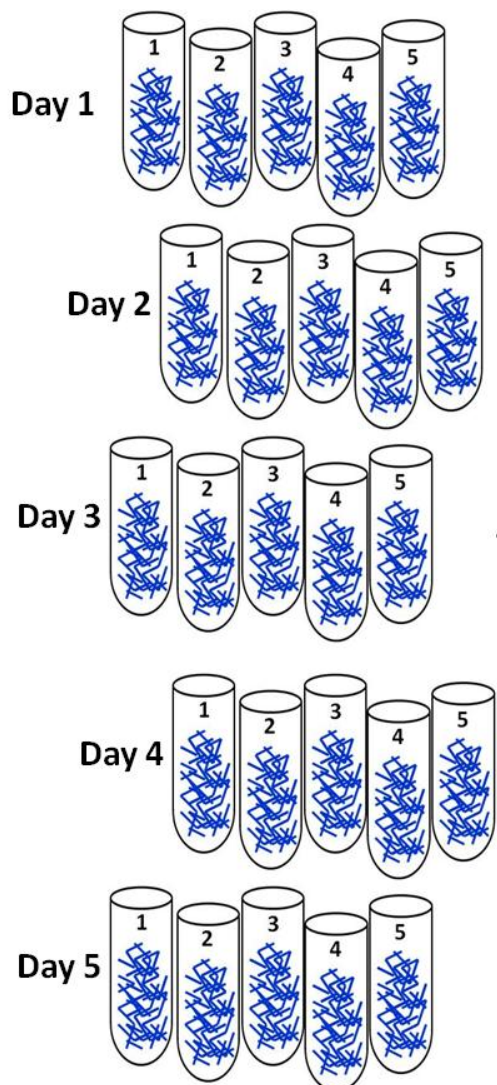

LC-MRM(PRM)-MS  
Analysis

| Day | Replicate          |       |       |       |       |       |
|-----|--------------------|-------|-------|-------|-------|-------|
|     | 1                  | 2     | 3     | 4     | 5     |       |
| 1   | 19396              | 17334 | 17325 | 15488 | 16573 | 8.3%  |
| 2   | 24686              | 21386 | 21000 | 23260 | 22226 | 6.6%  |
| 3   | 22121              | 26532 | 22050 | 20064 | 26730 | 12.7% |
| 4   | 17280              | 18572 | 20295 | 14404 | 21384 | 14.8% |
| 5   | 21881              | 19859 | 21450 | 16840 | 22113 | 10.7% |
|     | 13.4%              | 17.2% | 9.0%  | 20.1% | 16.5% |       |
|     | <b>Ave</b>         |       |       |       |       | 10.6% |
|     | 13.2%              |       |       |       |       |       |
|     | <b>Total error</b> |       |       |       |       | 17.0% |
